# Supplementary material for: Multivariate unmixing approaches on Raman images of plant cell walls: new insights or overinterpretation of results?
Source: PubMed Central journal article supplement (PMC6031114; doi:10.1186/s13007-018-0320-9), 2018-07-04

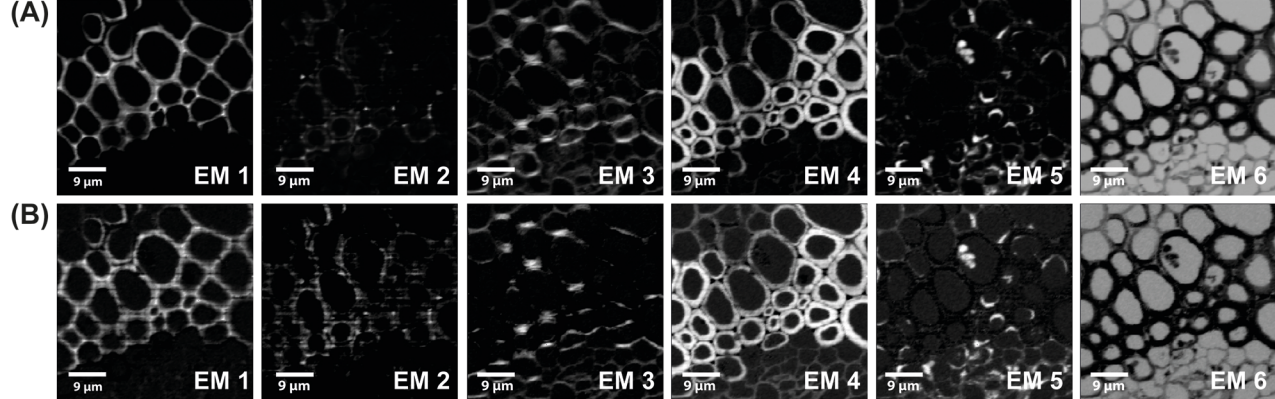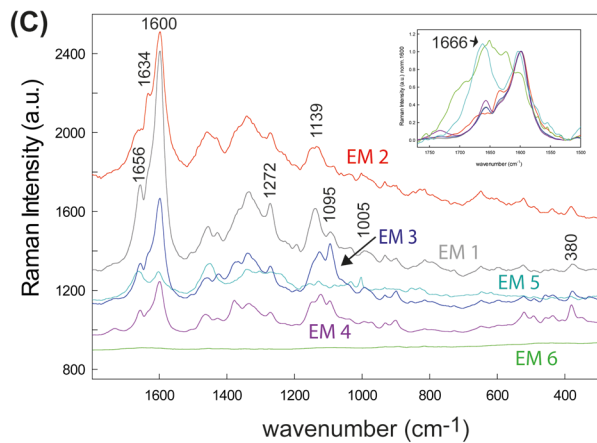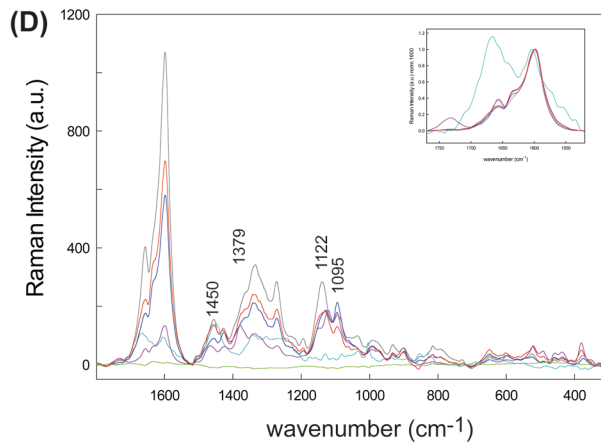

Supplement: 13007_2018_320_MOESM3_ESM.pdf [file 13007_2018_320_MOESM3_ESM.pdf]
