# Supplementary material for: Multivariate unmixing approaches on Raman images of plant cell walls: new insights or overinterpretation of results?
Source: Springer Nature journal article supplement (doi:10.1186/s13007-018-0320-9), 2018-07-04

VCA

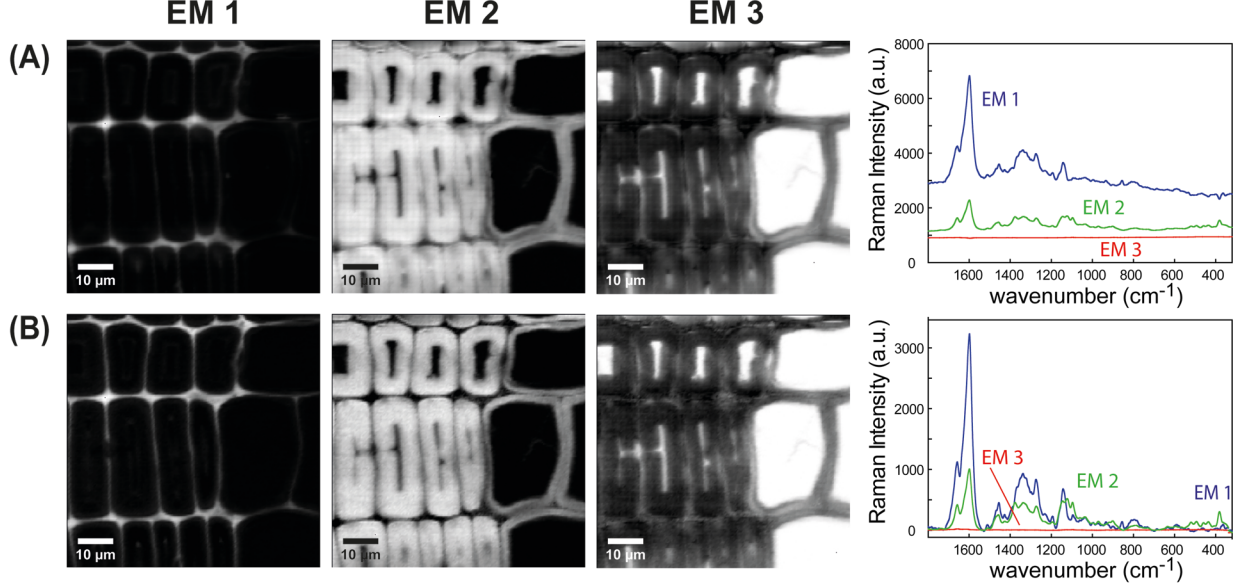

NMF

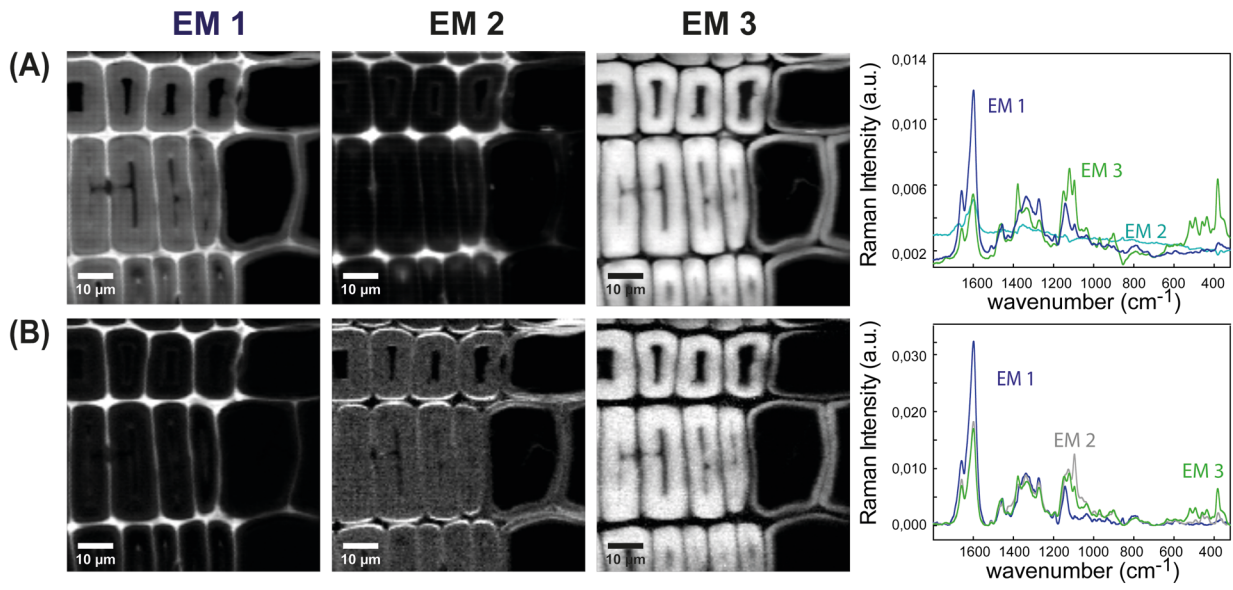

Supplement: MOESM9 [file 13007_2018_320_MOESM9_ESM.pdf › 13007_2018_320_MOESM9_ESM.pdf]
